# Supplementary material for: Comparison of RNA m6A and DNA methylation profiles between mouse female germline stem cells and STO cells
Source: PubMed Central journal article supplement — Mol Ther Nucleic Acids. 2020 Nov 26;23:431–9. doi: 10.1016/j.omtn.2020.11.020 (PMC7803632; doi:10.1016/j.omtn.2020.11.020), 2020-11-26
Supplement: mmc1.pdf [file mmc1.pdf]

**OMTN, Volume 23**

**Supplemental Information**

**Comparison of RNA m<sup>6</sup>A and DNA  
methylation profiles between mouse female  
germline stem cells and STO cells**

**Xinyan Zhao, Geng G. Tian, Qian Fang, Xiuying Pei, Zhaoxia Wang, and Ji Wu**

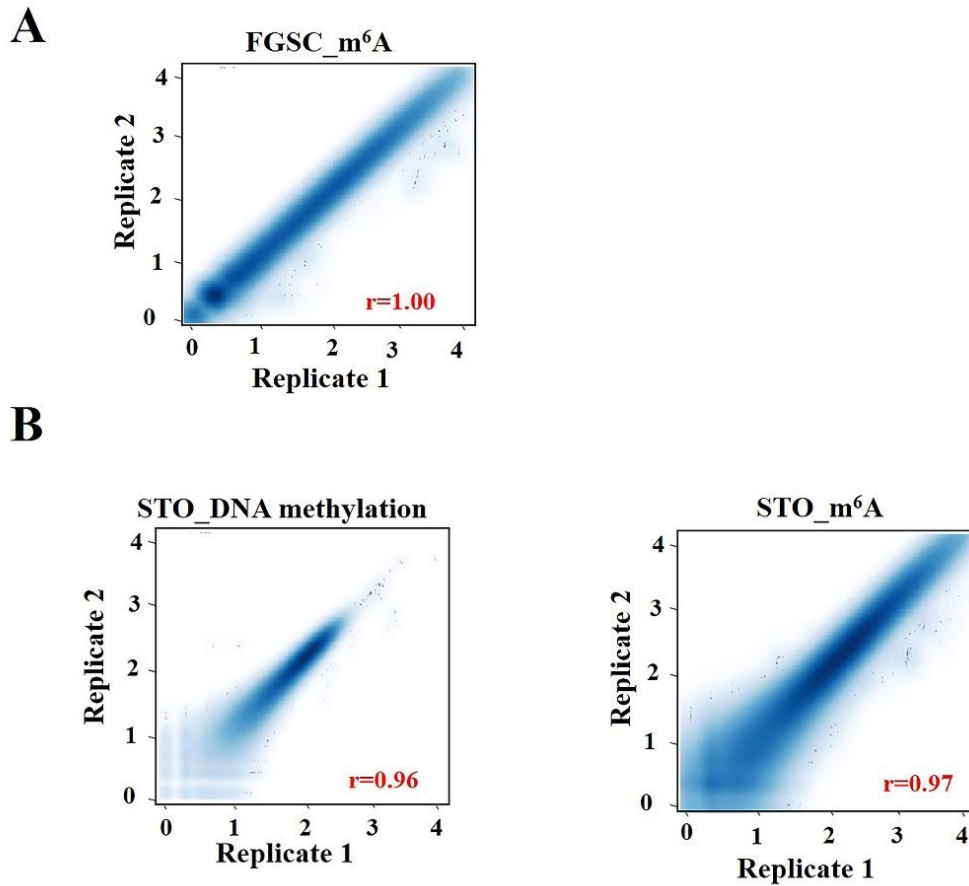

**Figure S1. The repeatability and reliability of sequence data.**

(A) Correlation analysis of replicate data, including MeRIP-Seq in FGSCs. (B) Correlation analysis of replicate data, including MeDIP-Seq and MeRIP-Seq in STO cells. Correlation was computed using whole-genome data.

**Table S1: Sequence of primers used in RT-PCR:**

| Gene            | Product Size(bp) | Primer Sequence (5' - 3')                          |
|-----------------|------------------|----------------------------------------------------|
| <i>Mvh</i>      | 213bp            | GGAAACCAGCAGCAAGTGAT<br>TGGAGTCCTCATCCTCTGG        |
| <i>Oct4</i>     | 430bp            | GGAGGAAGCCGACAACAA<br>AGCAGTGACGGGAACAGA           |
| <i>Stella</i>   | 354bp            | CCCAATGAAGGACCCTGAAAC<br>AATGGCTCACTGTCCCGTTCA     |
| <i>Fragilis</i> | 295 bp           | TCCGTGAAGTCTAGGGATCG<br>TGTTACACCTGCGTGTAGGG       |
| <i>Blimp-1</i>  | 483 bp           | CGGAAAGCAACCCAAAGCAATAC<br>CCTCGGAACCATAGGAAACATTC |
| <i>Gapdh</i>    | 458 bp           | GTCCCGTAGACAAAATGGTGA<br>TGCATTGCTGACAATCTTGAG     |

**Table S2: Sequence of primers used in qRT-PCR:**

| Gene           | Product Size(bp) | Primer Sequence (5'- 3')                          |
|----------------|------------------|---------------------------------------------------|
| <i>Mettl3</i>  | 173 bp           | CTGGGCACTTGGATTTAAGGAA<br>TGAGAGGTGGTGTAGCAACTT   |
| <i>Mettl14</i> | 105 bp           | CTGAGAGTGCGGATAGCATTG<br>GAGCAGATGTATCATAGGAAGCC  |
| <i>Wtap</i>    | 67 bp            | GAACCTCTTCCTAAAAAGGTCCG<br>TTAACTCATCCCGTGCCATAAC |
| <i>Alkbh5</i>  | 144 bp           | CGCGGTCATCAACGACTACC<br>ATGGGCTTGAAGTGGAACTTG     |
| <i>Fto</i>     | 137 bp           | TTCATGCTGGATGACCTCAATG<br>GCCAACTGACAGCGTTCTAAG   |
| <i>Ythdf1</i>  | 128 bp           | ACAGTTACCCCTCGATGAGTG<br>GGTAGTGAGATACGGGATGGGA   |
| <i>Ythdf2</i>  | 102 bp           | GAGCAGAGACCAAAAAGGTCAAG<br>CTGTGGGCTCAAGTAAGGTTT  |
| <i>Ythdf3</i>  | 98bp             | AACCAGGGGCATTAGGAAATACC<br>TCCACTTGTTCCCATGTAGAG  |
| <i>Ythdc1</i>  | 162bp            | GTCCACATTGCCTGTAAATGAGA<br>GGAAGCACCCAGTGTATAGGA  |
| <i>Ythdc2</i>  | 154bp            | ACCGACTAAGTCAATCTCTTGGT<br>AGGCTCCTAACAGCATGTTTTG |
| <i>Gapdh</i>   | 123bp            | AGGTCGGTGTGAACGGATTTG<br>TGTAGACCATGTAGTTGAGGTCA  |
| <i>Dnmt1</i>   | 178bp            | AAGAATGGTGTGTCTACCGAC<br>CATCCAGGTTGCTCCCTTG      |
| <i>Dnmt3a</i>  | 176bp            | CTGTCAGTCTGTCAACCTCAC<br>GTGGAAACCACCGAGAACAC     |
| <i>Dnmt3b</i>  | 72bp             | AGCGGGTATGAGGA<br>GGGAGCATCCTTCGTGTCTG            |
